# Supplementary material for: Integrative epigenomic analysis of differential DNA methylation in urothelial carcinoma
Source: PubMed Central journal article supplement (PMC4373102; doi:10.1186/s13073-015-0144-4), 2015-03-10

**A**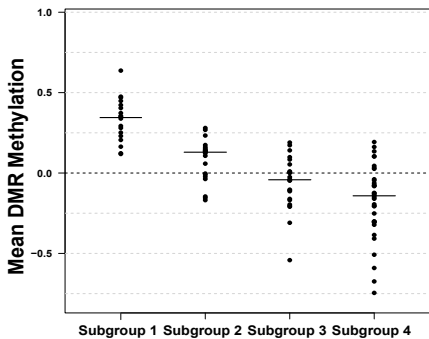**B**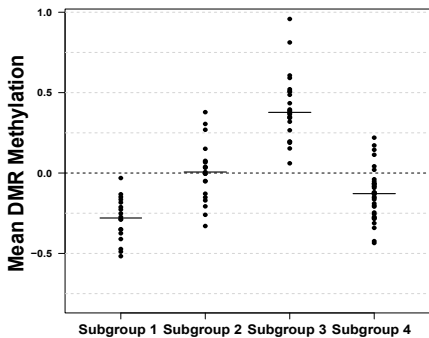**C**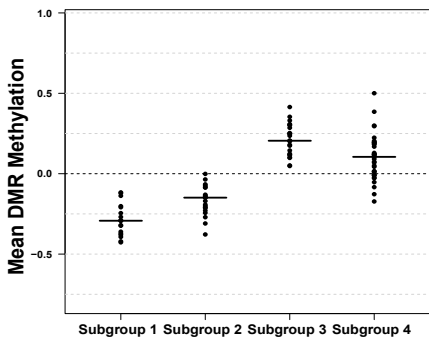

Supplement: 13073_2015_144_MOESM5_ESM.pdf [file 13073_2015_144_MOESM5_ESM.pdf]
