# Supplementary material for: Integrative epigenomic analysis of differential DNA methylation in urothelial carcinoma
Source: PubMed Central journal article supplement (PMC4373102; doi:10.1186/s13073-015-0144-4), 2015-03-10

**A**

| LINE1/LTR overlap |                    |                   |
|-------------------|--------------------|-------------------|
|                   | False (%)          | True (%)          |
| <b>Background</b> | <b>1825 (66.2)</b> | <b>931 (33.8)</b> |
| <b>Pattern 1</b>  | <b>461 (68.6)</b>  | <b>211 (31.4)</b> |
| <b>Pattern 2</b>  | <b>583 (89.7)</b>  | <b>67 (10.3)</b>  |
| <b>Pattern 3</b>  | <b>1062 (77.2)</b> | <b>313 (22.8)</b> |

**B**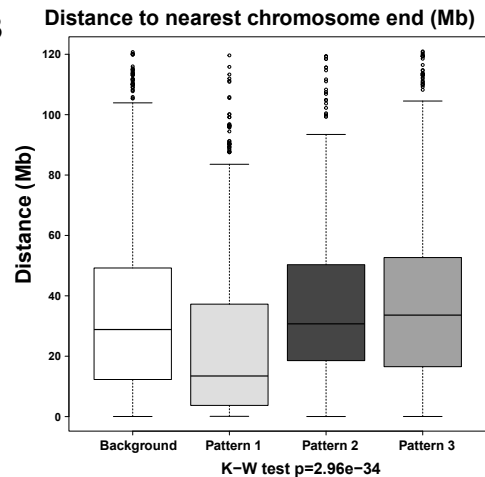**C**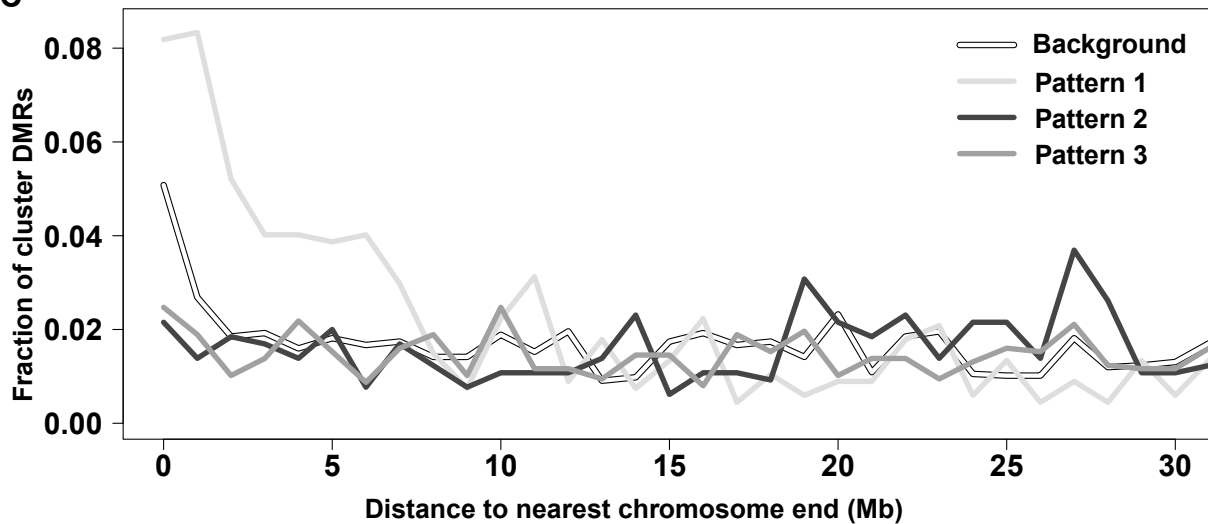

Supplement: 13073_2015_144_MOESM6_ESM.pdf [file 13073_2015_144_MOESM6_ESM.pdf]
